# Supplementary material
Source: Springer Nature journal article supplement (https://www.springermedizin.de/resource/supplementary/12950_2009_133_MOESM6_ESM.pdf/9558032)

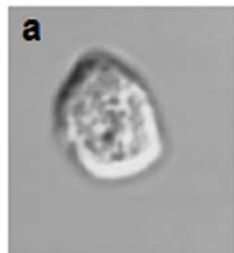

Baseline

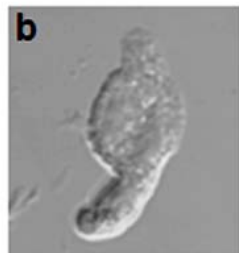

IL-8/CXCL8

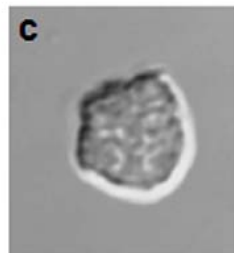

+ TFMK

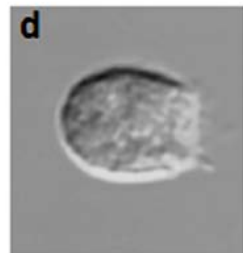

+ Pyrro

IL-8/CXCL8

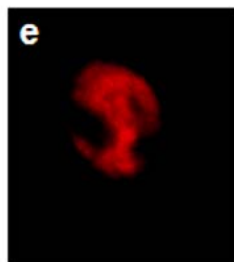

Baseline

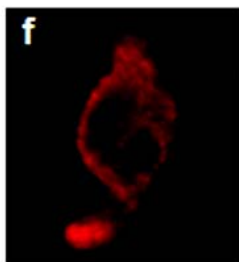

IL-8/CXCL8

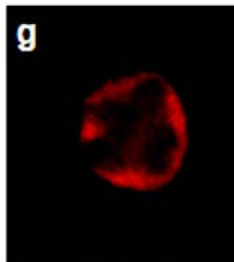

+ TFMK

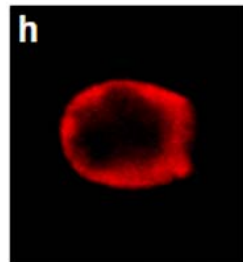

+ Pyrro

IL-8/CXCL8

Supplement: MOESM6 [file 9558032]
